# Supplementary material for: Graphene oxide nanocomposite hydrogel based on poly(acrylic acid) grafted onto salep: an adsorbent for the removal of noxious dyes from water
Source: Royal Society of Chemistry journal article supplement (doi:10.1039/c8nj05800h), 2019-01-01
Supplement: c8nj05800h1.pdf [file c8nj05800h1.pdf]

## Supporting information

### **Graphene oxide nanocomposite hydrogel based on poly(acrylic acid) grafted onto salep: adsorbent for the removal of noxious dyes from water**

**Ghasem Rezanejade Bardajee,<sup>a</sup> Samaneh Sadat Hosseini,<sup>a</sup> Cédric Vancaeyzeele<sup>b</sup>**

<sup>a</sup>Department of Chemistry, Payame Noor University, PO Box 19395-3697, Tehran, Iran

<sup>b</sup>Laboratoire de Physicochimie des Polymères et des Interfaces (LPPI, EA 2528), I-Mat, Université de Cergy-Pontoise, 5, mail Gay-Lussac, 95031 Cergy-Pontoise, France

Correspondence to

Ghasem Rezanejad Bardajee: E-mail address: rezanejad@pnu.ac.ir.

Cédric Vancaeyzeele: E-mail address cedric.vancaeyzeele@u-cergy.fr

Table S1. The calculated kinetic parameters for the absorption of MV onto GONH

| Kinetic models      | Parameters | 25 °C  | 30 °C   | 35 °C   | 40 °C   | 45 °C   |
|---------------------|------------|--------|---------|---------|---------|---------|
| Pseudo-first order  | $q_e$      | 1.065  | 1.012   | 1.056   | 1.05    | 1.151   |
|                     | $K_1$      | 0.067  | 0.0789  | 0.0697  | 0.0732  | 0.0757  |
|                     | $R^2$      | 0.4551 | 0.5475  | 0.5425  | 0.5672  | 0.5778  |
| Pseudo-second order | $q_e$      | 256.41 | 254.336 | 258.526 | 259.263 | 261.294 |
|                     | $K_2$      | 0.025  | 0.029   | 0.028   | 0.0281  | 0.0277  |
|                     | $R^2$      | 0.9875 | 0.9907  | 0.991   | 0.9924  | 0.9932  |

Table S2. The calculated isotherm parameters for the absorption of MV onto GONH

| Isotherms models | Parameters |        |
|------------------|------------|--------|
| Langmuir         | $q_m$      | 348.82 |
|                  | $K_L$      | 0.011  |
|                  | $R^2$      | 0.9991 |
| Freundlich       | $n$        | 3.913  |
|                  | $K_f$      | 3.885  |
|                  | $R^2$      | 0.9134 |

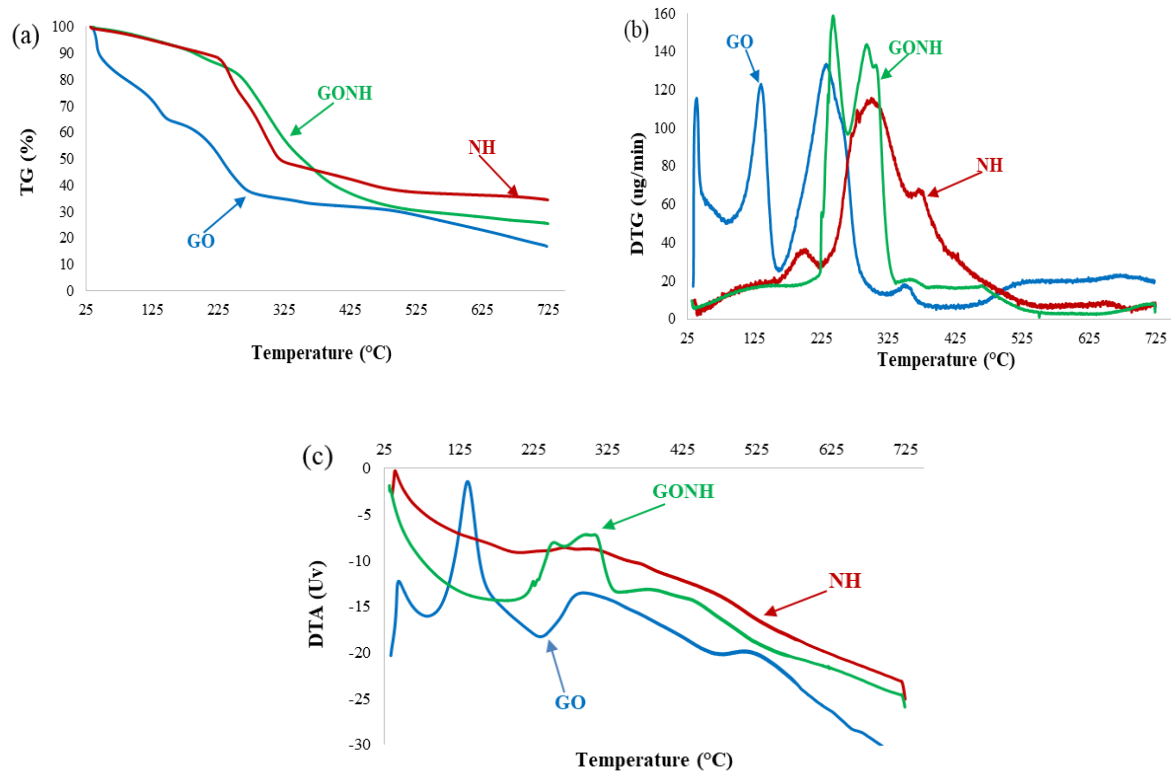

**Fig.S1** (a) TGA, (b) DTG, and (c) DTA curves of GO, NH and GONH at 20 °C/min under nitrogen atmosphere (flow rate 25 mL/min)

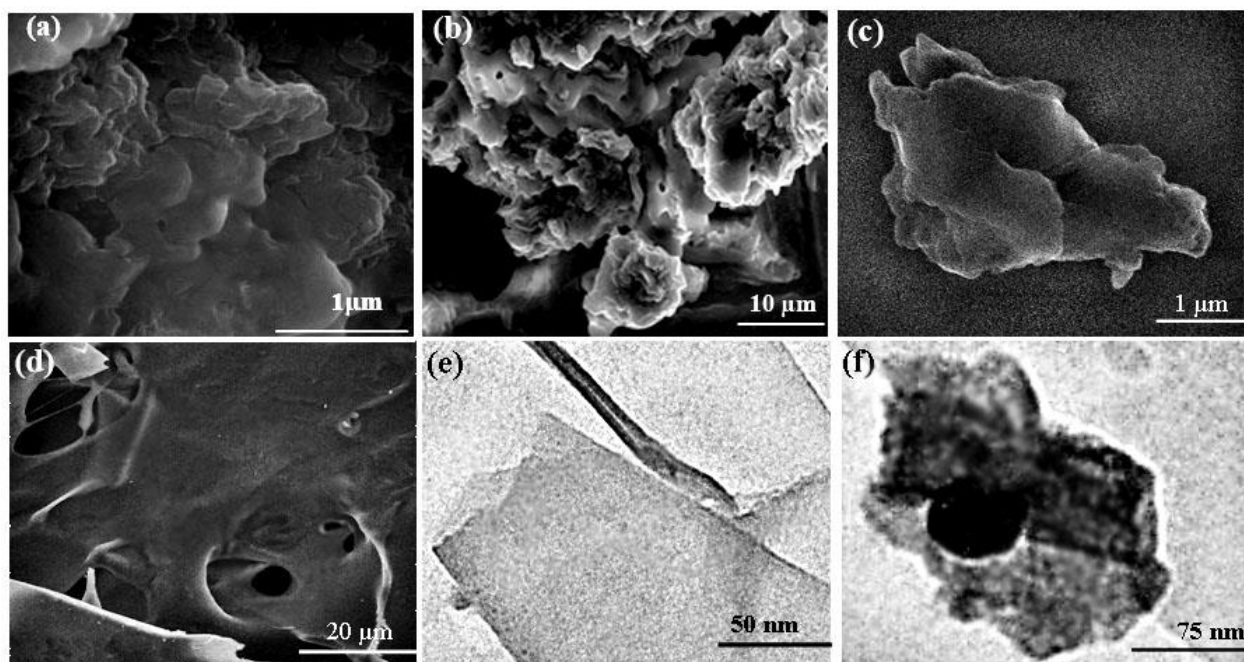

**Fig.S2** (a) and (b) SEM image of GONH, (c) SEM image of GO, (d) SEM image of NH, (e) TEM image of GO, and (f) TEM image of GONH

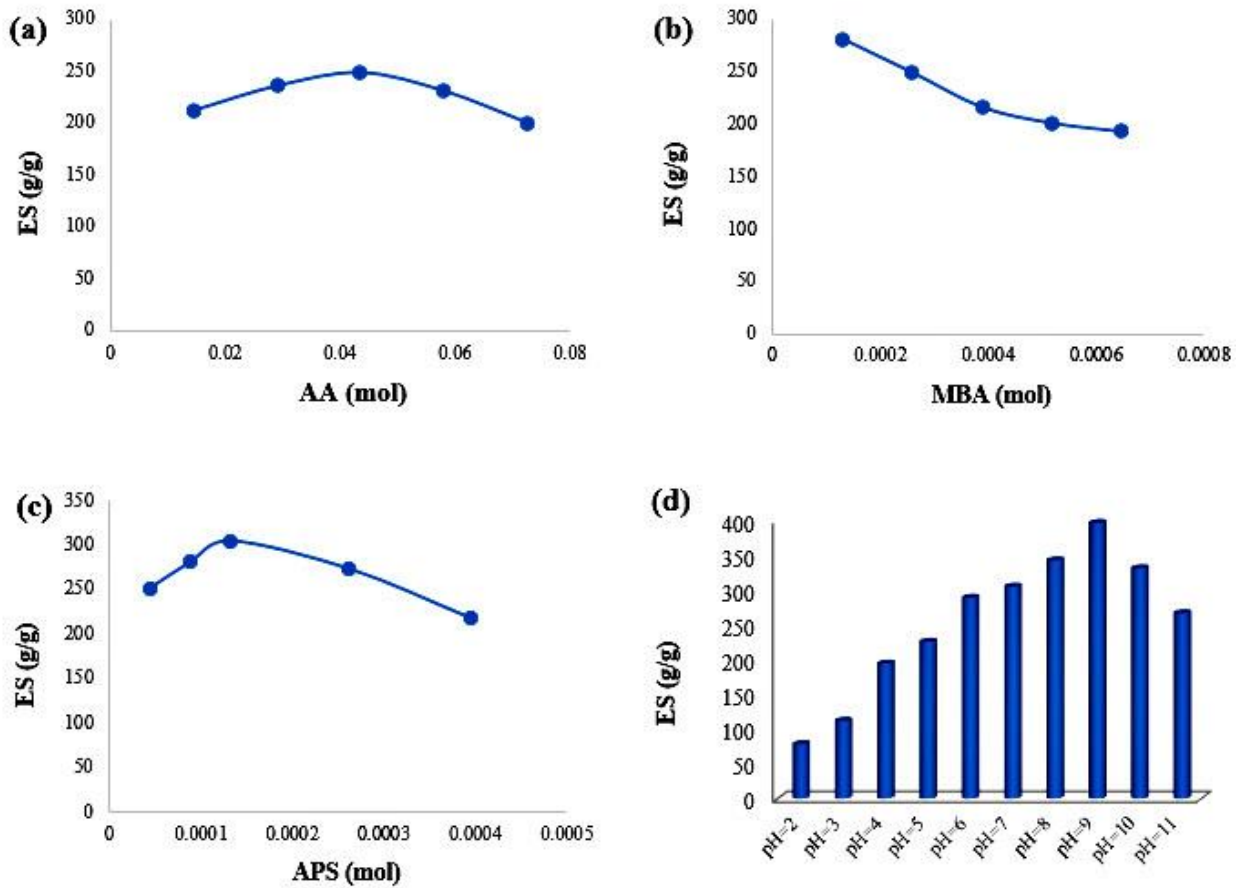

**Fig. S3** (a) Effect of the AA monomer amount on equilibrium swelling capacity of the GONH (reaction conditions: salep weight: 1.0 g, MBA:  $2.594 \times 10^{-4}$  mol and APS:  $8.764 \times 10^{-5}$  mol), (b) Effect of the MBA crosslinker amount on equilibrium swelling capacity of the GONH (reaction conditions: salep weight: 1.0 g, AA:  $4.363 \times 10^{-2}$  mol and APS:  $8.764 \times 10^{-5}$  mol), (c) Effect of the APS initiator amount on equilibrium swelling capacity of the GONH (reaction conditions: salep weight: 1.0 g, AA:  $4.363 \times 10^{-2}$  mol and MBA:  $1.297 \times 10^{-4}$  mol), and (d) Swelling dependency of the optimized GONH on pH

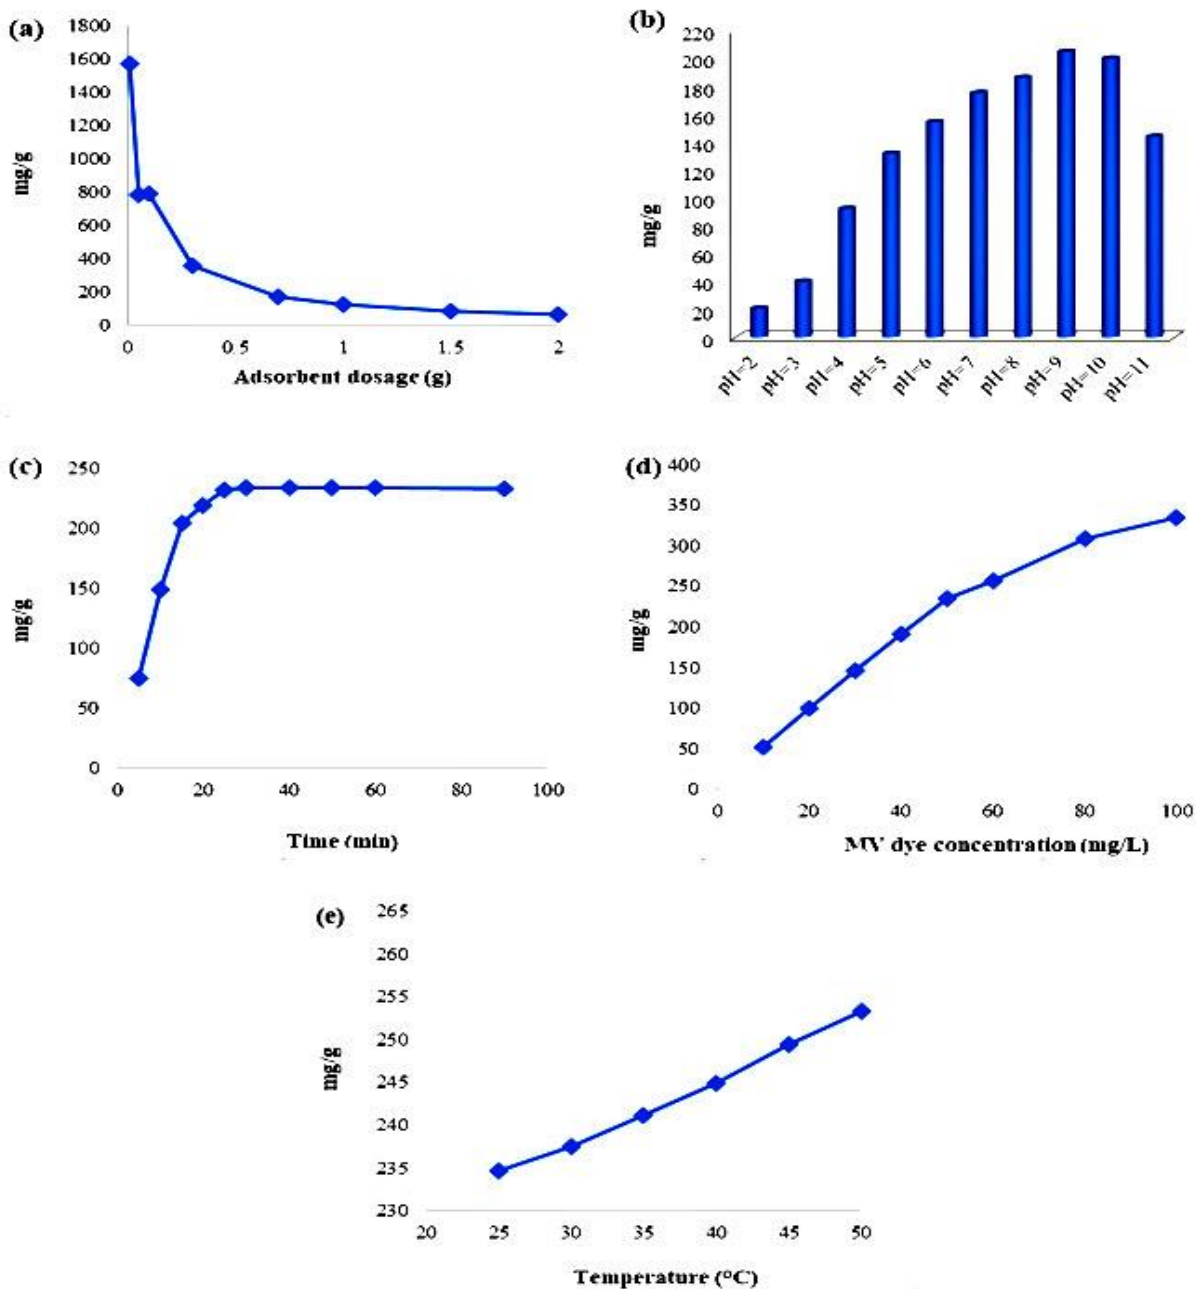

Fig. S4 (a) Effect of adsorbent dosage on adsorption capacity of MV dye (reaction conditions: pH solution: 7, contact time: 15 min, MV dye concentration: 50 mg/L, and temperature solution: 25 °C), (b) Effect of initial solution pH on adsorption capacity of MV dye (reaction conditions: GONH weight: 0.7 g, contact time: 15 min, MV dye concentration: 50 mg/L and temperature solution: 25 °C), (c) Effect of contact time on adsorption capacity of MV dye .(reaction conditions: GONH weight: 0.7 g, pH solution: 7, MV dye concentration: 50 mg/L, and temperature solution: 25 °C), (d) Effect of initial dye concentration on adsorption capacity of MV dye (reaction conditions: GONH weight: 0.7 g, pH solution: 7, contact time: 30 min, and temperature solution: 25 °C), and (e) Effect of temperature on adsorption capacity of MV dye (reaction conditions: GONH weight: 0.7 g, pH of solution: 7, contact time: 30 min, and MV dye concentration: 50 mg/L)

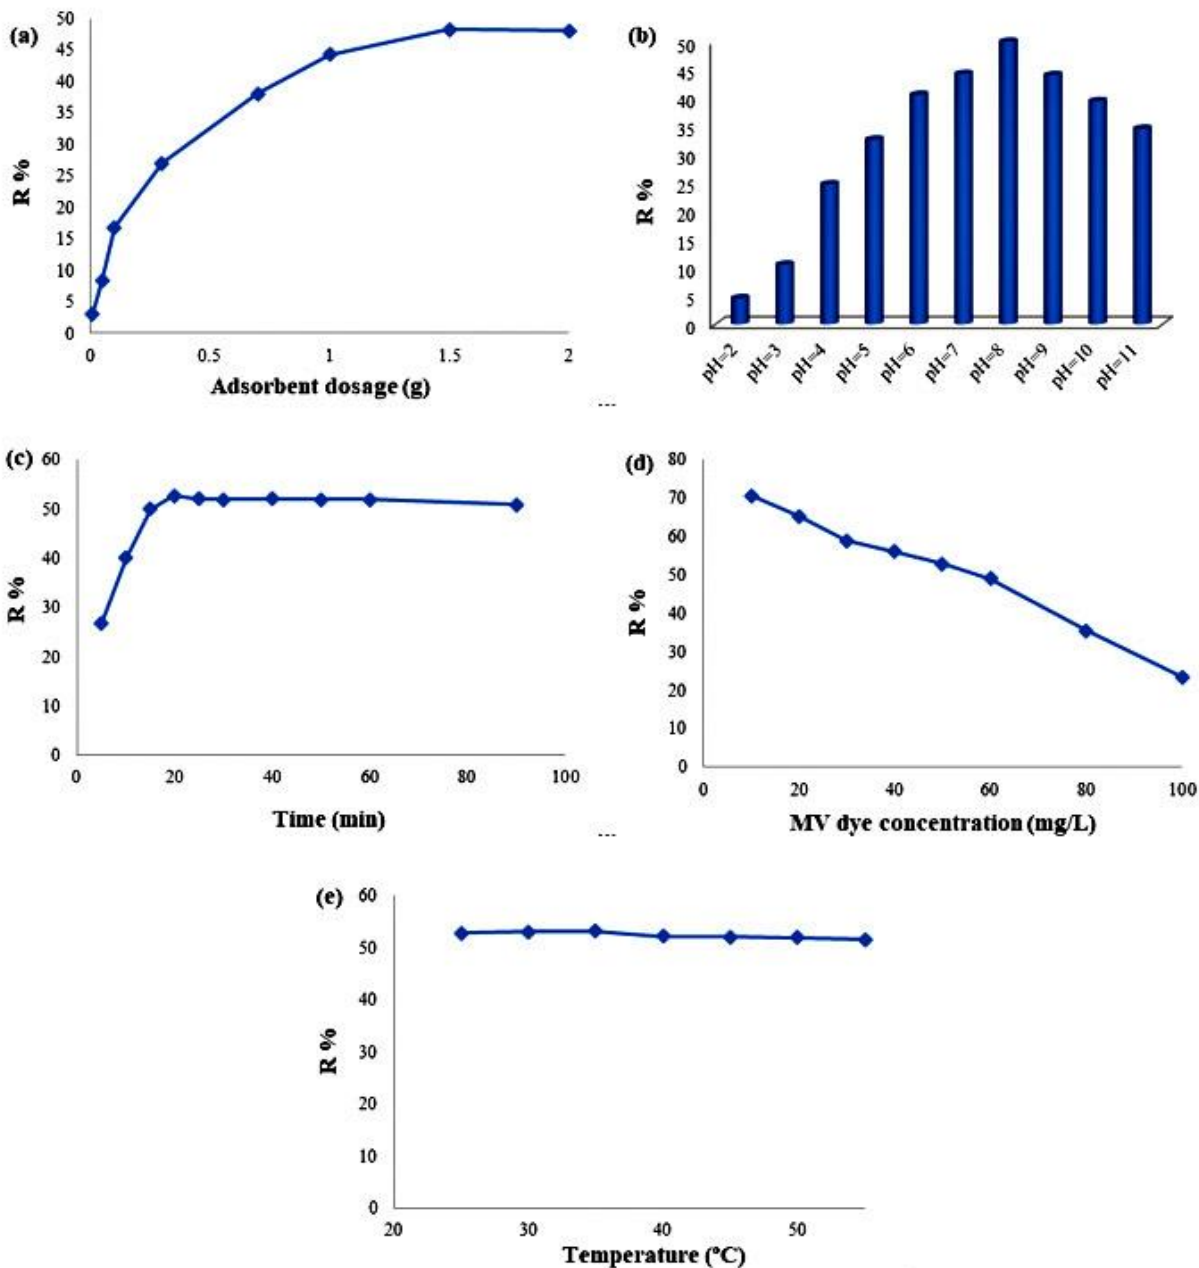

Fig. S5. (a) Effect of adsorbent dosage (GO) on removal percentage of MV dye (reaction conditions: pH solution: 7, contact time: 15 min, MV dye concentration: 50 mg/L, and temperature solution: 25 °C), (b) Effect of initial solution pH on removal percentage of MV dye (reaction conditions: GO weight: 1 g, contact time: 15 min, MV dye concentration: 50 mg/L and temperature solution: 25 °C), (c) Effect of contact time on removal percentage of MV dye (reaction conditions: GO weight: 1 g, pH solution: 8, MV dye concentration: 50 mg/L, and temperature solution: 25 °C), (d) Effect of initial dye concentration on removal percentage of MV dye (reaction conditions: GO weight: 1 g, pH solution: 8, contact time: 20 min, and temperature solution: 25 °C), and (e) Effect of temperature on removal percentage of MV dye (reaction conditions: GO weight: 1 g, pH of solution: 8, contact time: 20 min, and MV dye concentration: 50 mg/L)
